# Supplementary material
Source: HighWire-hosted journal article supplement (https://bmjopenquality.bmj.com/content/6/2/e000067)
Supplement: inline-supplementary-material-1 [file inline-supplementary-material-1.docx]

Appendix 1

|  | **Time period** | **Number of patients** | **Number of hospital visits per patient** | **Time from appointment to results of nerve conduction studies** | **Time from appointment (diagnosis) to surgery** |
| --- | --- | --- | --- | --- | --- |
| Baseline measurement group | 01/01/2013 – 31/06/2014 | 18 | 4 – 5 | 58 – 300 days  (median average 152 days) | 111 – 505 days  (median average 345 days) |
| Nerve conduction clinic group 1 | 14/01/2014 – 20/08/2014 | 30 | 3 | 21 – 258 days  (median average 76 days) | 120 – 776 days  (median average 409 days) |
| One stop clinic group | 15/07/2014 – 28/07/2015 | 37 | 1 | 0 days | 66 – 213 days  (median average 133 days) |
| Nerve conduction clinic group 2 | 5/11/2014 – 21/10/2015 | 30 | 3 | 2 – 223 days  (median average 51 days) | 13 – 434 days  (median average 260 days) |
